# Supplementary material for: Network simulation reveals significant contribution of network motifs to the age-dependency of yeast protein–protein interaction networks
Source: Royal Society of Chemistry journal article supplement (doi:10.1039/c4mb00230j), 2014-06-25
Supplement: c4mb00230j1.pdf [file c4mb00230j1.pdf]

Supplementary information

Tables:

Table S1. Details of the yeast PPI dataset used in our work.

| DataSet                   | Number of Nodes | Number of Interactions | Platform           |
|---------------------------|-----------------|------------------------|--------------------|
| LC-Kim <sup>1</sup>       | 3268            | 12058                  | Literature-curated |
| IDBOS-Gavin <sup>2</sup>  | 1274            | 7879                   | AP/MS              |
| IDBOS-Krogan <sup>3</sup> | 1719            | 3640                   | AP/MS              |
| Y2H-Union <sup>4</sup>    | 2019            | 2923                   | Y2H                |

1. Data is from [1]; 2. This data is from [2], we used the default cutoff 5.95; 3. This data is from [2], we used the default cutoff 12.92; 4. Data is from [3].

Table S2. The significance of the interactions within the age-homogeneous motifs.

| dataset      | motif size | number of age-homogenous motifs | deltaD after removing interactions within age-homogeneous motifs | original deltaD | p-value           |
|--------------|------------|---------------------------------|------------------------------------------------------------------|-----------------|-------------------|
| LC-Kim       | 3          | 2212                            | 0.11909275                                                       | 0.54            | <10 <sup>-3</sup> |
|              | 4          | 44562                           | -0.461184082                                                     |                 |                   |
| IDBOS-Gavin  | 3          | 4644                            | -0.29278693                                                      | 0.48            | <10 <sup>-3</sup> |
|              | 4          | 39456                           | -0.314663703                                                     |                 |                   |
| IDBOS-Krogan | 3          | 1272                            | 0.127818538                                                      | 0.88            | <10 <sup>-3</sup> |
|              | 4          | 3879                            | 0.203066283                                                      |                 |                   |
| Y2H-Union    | 3          | 40                              | 0.5975674                                                        | 0.7             | <10 <sup>-3</sup> |
|              | 4          | 195                             | 0.588700861                                                      |                 |                   |

Table S3. The number of motifs containing paralogs in age pattern #3 and 4#. The percentage is simply computed by the second column/third column to show a direct result.

| Motif | Number of Motifs Containing Paralogs | Number of Motifs Containing Paralog PairS in Age Patterns 3# and 4# | Percentage | Dataset      |
|-------|--------------------------------------|---------------------------------------------------------------------|------------|--------------|
| B     | 69                                   | 24                                                                  | 34.78%     | LC           |
| E     | 509                                  | 46                                                                  | 9.03%      | LC           |
| G     | 72                                   | 8                                                                   | 11.11%     | LC           |
| H     | 16                                   | 3                                                                   | 18.75%     | LC           |
| B     | 50                                   | 7                                                                   | 14%        | IDBOS-Gavin  |
| E     | 289                                  | 14                                                                  | 4.84%      | IDBOS-Gavin  |
| G     | 52                                   | 4                                                                   | 7.69%      | IDBOS-Gavin  |
| H     | 6                                    | 0                                                                   | 0          | IDBOS-Gavin  |
| B     | 93                                   | 9                                                                   | 9.67%      | IDBOS-Krogan |
| E     | 328                                  | 2                                                                   | 0.60%      | IDBOS-Krogan |

|   |     |   |       |              |
|---|-----|---|-------|--------------|
| G | 152 | 3 | 1.97% | IDBOS-Krogan |
| H | 87  | 2 | 2.29% | IDBOS-Krogan |

Table S4. Parameters for all the canonical models.

| Model                            | Node Size | Parameters                                         | Initial network         |
|----------------------------------|-----------|----------------------------------------------------|-------------------------|
| PA Model <sup>1</sup>            | 3000      | connections of new node $m_0=4$                    | 4 isolated nodes        |
| Symmetric DD Model <sup>2</sup>  | 3000      | Divergence prob $p=0.6$ ,<br>mutation prob $q=0.1$ | 4 fully connected nodes |
| Asymmetric DD Model <sup>3</sup> | 3000      | Divergence prob $p=0.587$                          | 4 fully connected nodes |
| CG Model <sup>4</sup>            | 3000      | Newman algorithm to divide<br>the communities      | 4 fully connected nodes |

1. Preferential Attachment Model 2. Symmetric Duplication-Divergence Model 3. Asymmetric Duplication-Divergence Model 4. Crystal Growth Model

Figures:

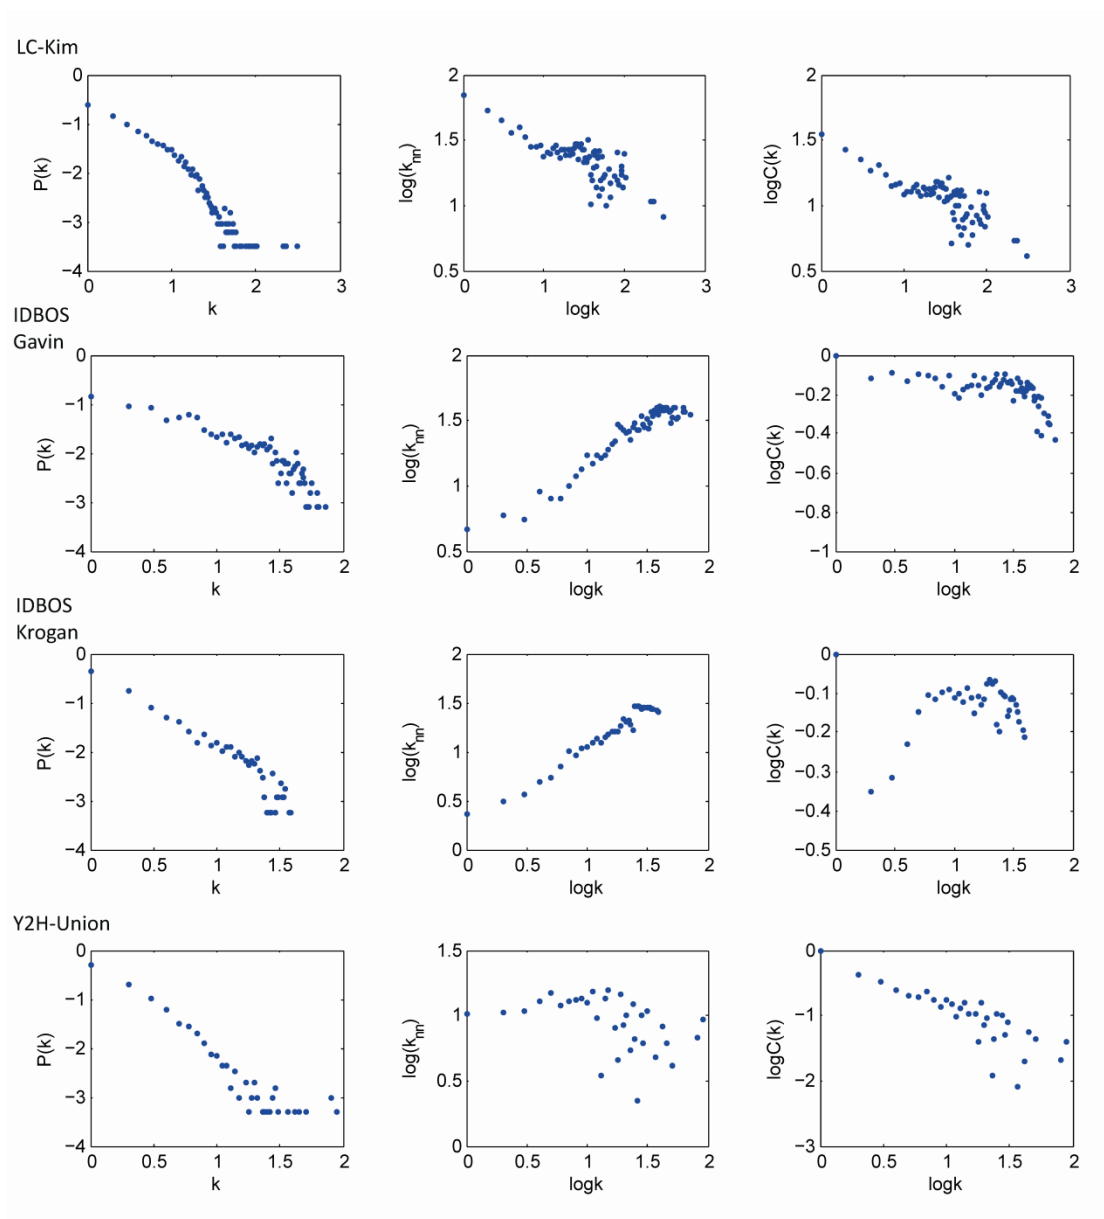

Figure S1. The degree distribution  $P(k)$ , clustering coefficient  $C(k)$  and the average degree of nearest neighbors  $\langle k_{nn} \rangle$  of the four yeast PPI networks.

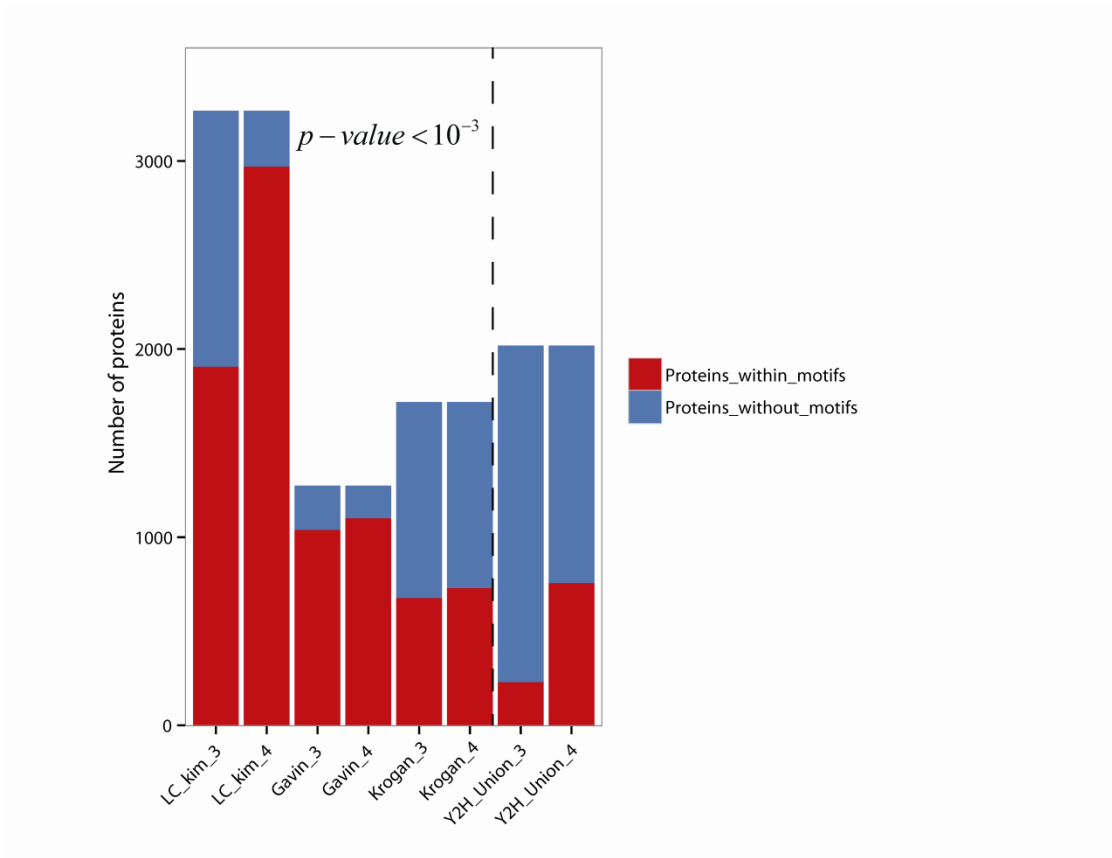

Figure S2. The number of proteins within/without network motifs across the four yeast PPI datasets. The p-value shows that proteins within network motifs among three datasets are significantly enriched in SGD\_complexes where as no such tendency observed in Y2H-Union data. Same result holds for CYC\_2008 coplexes.

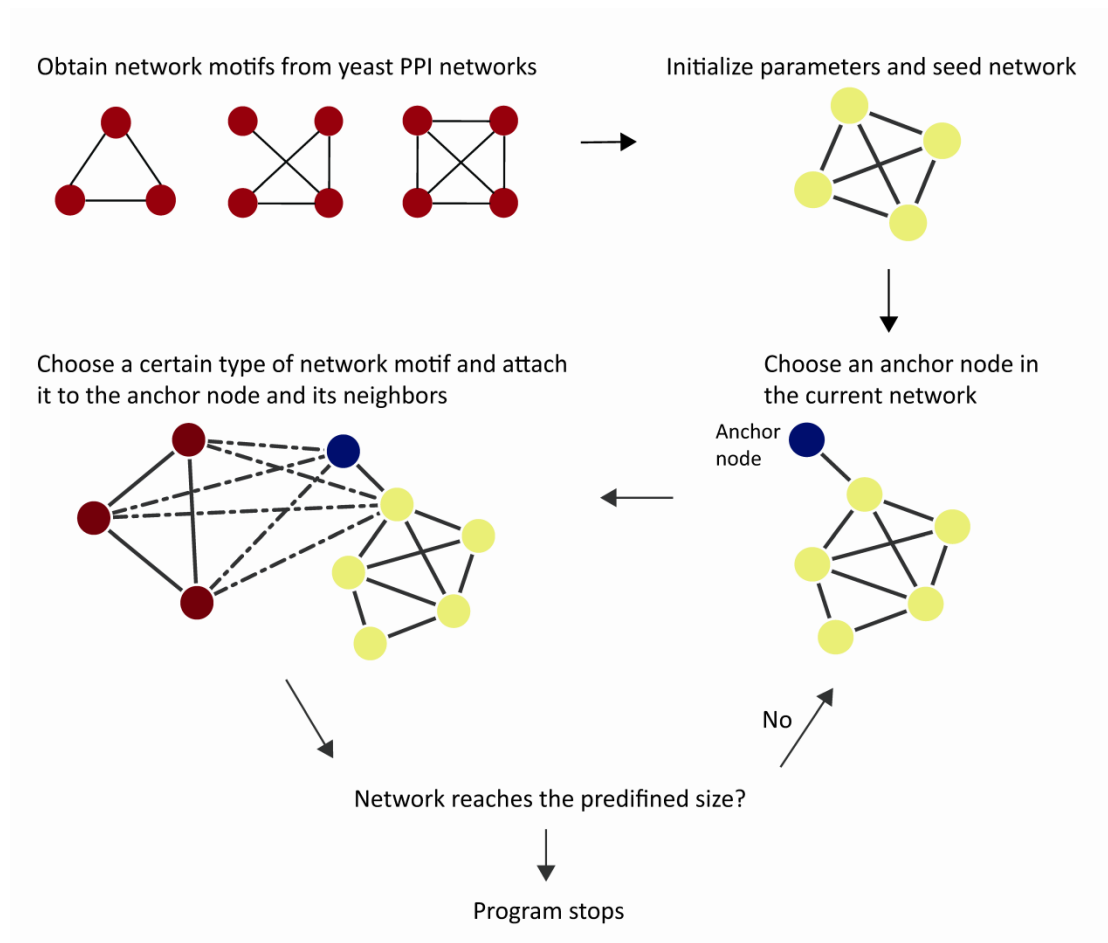

Figure S3. An illustration for our Network Motif model

1. Kim WK, Marcotte EM (2008) Age-dependent evolution of the yeast protein interaction network suggests a limited role of gene duplication and divergence. *PLoS Comput Biol* 4: e1000232.
2. Yu X, Ivanic J, Wallqvist A, Reifman J (2009) A novel scoring approach for protein co-purification data reveals high interaction specificity. *PLoS Comput Biol* 5: e1000515.
3. Yu H, Braun P, Yildirim MA, Lemmens I, Venkatesan K, et al. (2008) High-quality binary protein interaction map of the yeast interactome network. *Science* 322: 104-110.
